# Supplementary material
Source: PubMed Central journal article supplement (PMC9403855)
Supplement: jamasurg-e223677-s001.pdf [file jamasurg-e223677-s001.pdf]

## Supplemental Online Content

Byrne JP, Kaufman E, Scantling D, et al. Association between geospatial access to care and firearm injury mortality in Philadelphia. *JAMA Surg*. Published online August 24, 2022. doi:10.1001/jamasurg.2022.3677

**eFigure.** Philadelphia roads map derived from network dataset of US streets

**eTable 1.** Trauma Centers in Philadelphia and Surrounding Counties

**eTable 2.** Derivation of Wound Locations from Wound Descriptors in Shooting Victims Dataset

**eTable 3.** Sensitivity Analysis: Multivariable model of cohort with penetrating truncal or multiple injuries

**eTable 4.** Calculation of the Population Attributable Fraction of Shooting Fatalities due to Variable Access to Trauma Care

This supplemental material has been provided by the authors to give readers additional information about their work.

eFigure. Philadelphia roads map derived from network dataset of US streets

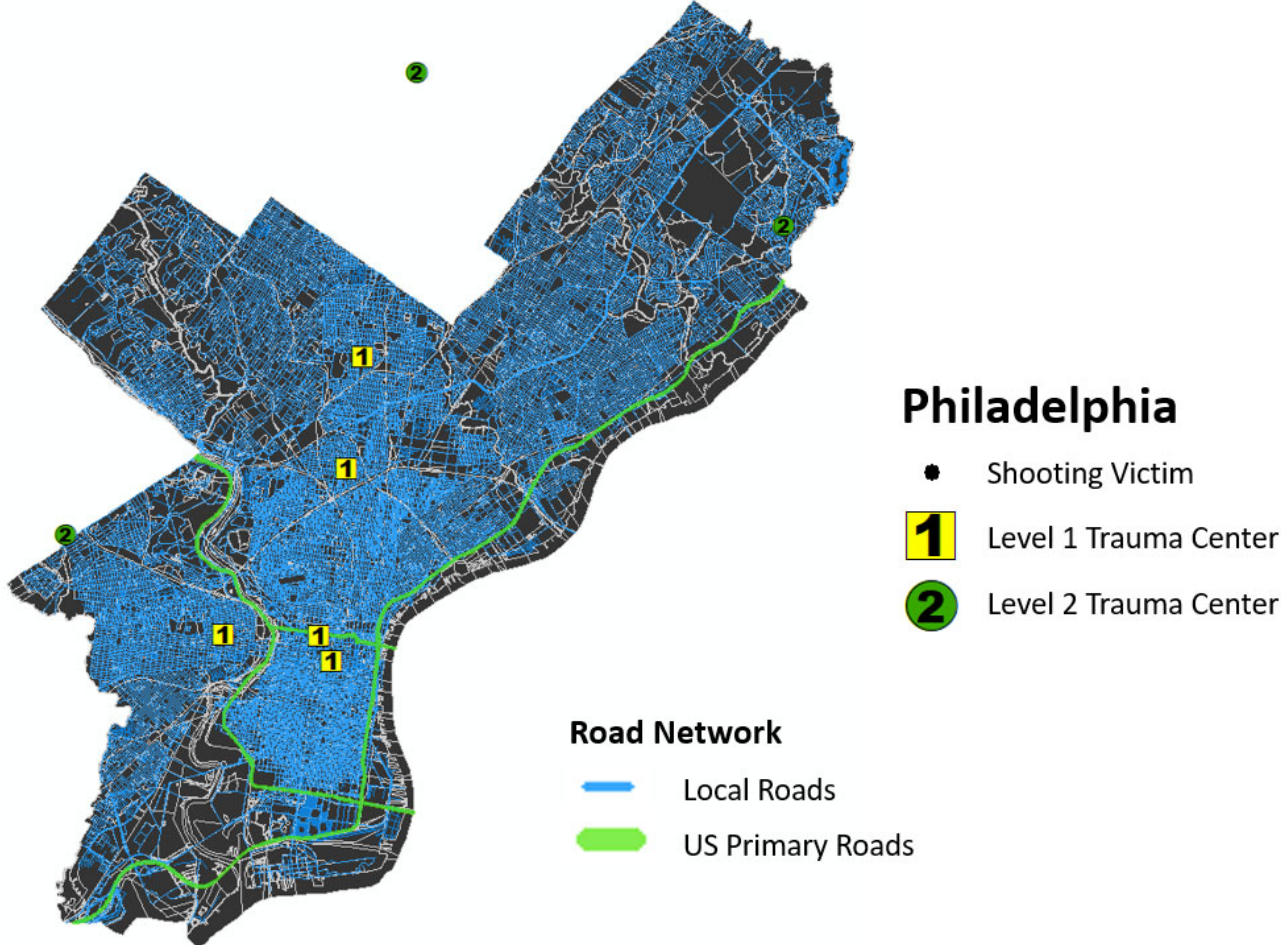

| <b>eTable 1. Trauma Centers in Philadelphia and Surrounding Counties</b> |                   |                  |
|--------------------------------------------------------------------------|-------------------|------------------|
| <b>Level 1 Trauma Centers</b>                                            | <b>Opened</b>     | <b>Closed</b>    |
| Hahnemann University Hospital                                            | 1986              | June 29, 2019    |
| Hospital of the University of Pennsylvania                               | 1987              | February 4, 2015 |
| Einstein Medical Center                                                  | 1987              | -                |
| Pennsylvania Presbyterian Medical Center                                 | February 4, 2015  | -                |
| Temple University Hospital                                               | 1987              | -                |
| Thomas Jefferson University Hospital                                     | 1987              | -                |
| <b>Level 2 Trauma centers</b>                                            | <b>Opened</b>     | <b>Closed</b>    |
| Abington Hospital                                                        | 1987              | -                |
| Jefferson Torresdale                                                     | 1986              | -                |
| Crozier Chester Medical Center                                           | 1986              | -                |
| Lankenau Medical Center                                                  | September 1, 2016 | -                |

**eTable 2.** Derivation of Wound Locations from Wound Descriptors in Shooting Victims Dataset

| <b>Head Wound</b>      |            |               |             |
|------------------------|------------|---------------|-------------|
| HEAD                   | head       | head/neck     | multi/head  |
| Head                   | head-m     | temple        | mutli/head  |
| eye                    | head-md    | NOSE          | multi/face  |
| ear                    | head/back  | Multiple/Hea  | multi/ hea  |
| cheek                  | head/chest | Multiple/Head |             |
| head/mullt             | back/head  | face/multi    |             |
| mult/headi             | head/multi | face          |             |
| <b>Torso Wound</b>     |            |               |             |
| ABDOMEN                | Stomach    | buttock       | leg/buttock |
| Abdomen                | aabdomen   | buttocks      | multi tors  |
| BACK                   | abdom      | cheat         | pelvis      |
| Back                   | abdome     | chest         | ribs        |
| Buttocks               | abdomen    | chest         | side        |
| CHEST                  | armpit     | chest/back    | stom        |
| Chest                  | back       | flank         | stomach     |
| Groin                  | back/head  | groin         | testicle    |
| Pelvis                 | body       | head/back     | torso       |
| STOMACH                | butt       | head/chest    | waist       |
| <b>Neck Wound</b>      |            |               |             |
| NECK                   | Neck       | head/neck     | neck        |
| throat                 |            |               |             |
| <b>Extremity Wound</b> |            |               |             |
| ANKLE                  | feet       | wrist         | finger      |
| Ankle                  | foot       | elbow         | fingers     |
| FOOT                   | hip        | ARM           | forearm     |
| Foot                   | knee       | Arm           | hand        |
| Hip                    | knees      | HAND          | multi/arm   |
| KNNES                  | leg        | Hand          | shou        |
| LEG                    | leg/buttoc | SHOULDER      | shoul       |
| Leg                    | leg/multi  | Shoulder      | should      |
| THIGH                  | legs       | Wrist         | shouldeer   |
| ankle                  | multi leg  | arm           | shoulder    |
| ankles                 | shin       | arms          | shoulders   |
| calf                   | thigh      | thumb         |             |
| toe                    | thighs     | shouldr       |             |
| <b>Multiple Wounds</b> |            |               |             |
| MULTI                  | face/multi | mult/headi    | multi/face  |
| Multi                  | leg/multi  | multi         | multi/head  |
| Multiple               | head/multi | multi leg     | multii      |
| Multiple/Hea           | mukti      | multi tors    | multli      |
| Multiple/Head          | mullti     | multi/ hea    | mutli       |
| head/multi             | mult       | multi/arm     | mutli/head  |

| <b>eTable 3. Sensitivity Analysis: Multivariable model of cohort with penetrating truncal or multiple injuries</b> |                  |             |
|--------------------------------------------------------------------------------------------------------------------|------------------|-------------|
| Parameter                                                                                                          | Odds of Fatality | 95% CI      |
| <i>Access to Closest Trauma Center</i>                                                                             |                  |             |
| Predicted transport time (per minute increase)                                                                     | 1.03             | 1.01 – 1.05 |
| <i>Baseline Characteristics</i>                                                                                    |                  |             |
| Age (per year increase)                                                                                            | 1.01             | 1.01 – 1.02 |
| Female sex (vs. male)                                                                                              | 0.76             | 0.56 – 1.01 |
| White race (vs. black)                                                                                             | 0.76             | 0.63 – 0.92 |
| <i>Injury Characteristics</i>                                                                                      |                  |             |
| Penetrating truncal                                                                                                | 1.38             | 0.91 – 2.09 |
| Multiple wounds                                                                                                    | 1.51             | 0.99 – 2.28 |
| <i>Event Characteristics</i>                                                                                       |                  |             |
| Indoor shooting                                                                                                    | 1.90             | 1.43 – 2.53 |
| Time of day                                                                                                        |                  |             |
| midnight – 6am                                                                                                     | 1.17             | 0.99 – 1.40 |
| 6am – 12 noon                                                                                                      | 1.03             | 0.83 – 1.28 |
| 12 noon – 6pm                                                                                                      | 1.01             | 0.85 – 1.20 |
| 6pm – midnight                                                                                                     | Reference        | NA          |
| Season                                                                                                             |                  |             |
| Summer (June – Aug)                                                                                                | Reference        | NA          |
| Fall (Sept – Nov)                                                                                                  | 1.17             | 0.97 – 1.36 |
| Winter (Dec – Feb)                                                                                                 | 1.32             | 1.09 – 1.59 |
| Spring (Mar – May)                                                                                                 | 1.13             | 0.94 – 1.36 |
| CI, confidence interval<br>c-statistic = 0.81                                                                      |                  |             |

**eTable 4. Calculation of the Population Attributable Fraction of Shooting Fatalities due to Variable Access to Trauma Care**

| Predicted Transport Time (minutes) | Shooting Victims (N = 10,105) | Fatalities (N = 1,999) | Pc    | Adjusted MRR | AP          | PAF    | Deaths Attributable to Delayed Access |
|------------------------------------|-------------------------------|------------------------|-------|--------------|-------------|--------|---------------------------------------|
| ≤1                                 | 232                           | 29                     | 0.015 | 1.00         | 0.000       | 0.000  | 0                                     |
| 1-2                                | 475                           | 92                     | 0.046 | 1.31         | 0.239       | 0.011  | 22.0                                  |
| 2-3                                | 923                           | 167                    | 0.084 | 1.17         | 0.147       | 0.012  | 24.5                                  |
| 3-4                                | 1150                          | 225                    | 0.113 | 1.31         | 0.237       | 0.027  | 53.4                                  |
| 4-5                                | 1432                          | 297                    | 0.149 | 1.28         | 0.219       | 0.033  | 65.1                                  |
| 5-6                                | 1499                          | 278                    | 0.139 | 1.28         | 0.218       | 0.030  | 60.6                                  |
| 6-7                                | 1606                          | 313                    | 0.157 | 1.31         | 0.234       | 0.037  | 73.3                                  |
| 7-8                                | 1074                          | 210                    | 0.105 | 1.19         | 0.158       | 0.017  | 33.2                                  |
| 8-9                                | 522                           | 119                    | 0.060 | 1.38         | 0.276       | 0.016  | 32.9                                  |
| 9-10                               | 253                           | 62                     | 0.031 | 1.42         | 0.297       | 0.009  | 18.4                                  |
| 10-11                              | 289                           | 66                     | 0.033 | 1.78         | 0.438       | 0.014  | 28.9                                  |
| 11-12                              | 312                           | 60                     | 0.030 | 1.32         | 0.241       | 0.007  | 14.5                                  |
| 12-13                              | 140                           | 34                     | 0.017 | 1.47         | 0.319       | 0.005  | 10.9                                  |
| 13-14                              | 115                           | 29                     | 0.015 | 1.57         | 0.363       | 0.005  | 10.5                                  |
| 14-15                              | 59                            | 11                     | 0.006 | 1.72         | 0.418       | 0.002  | 4.6                                   |
| >15                                | 24                            | 7                      | 0.004 | 1.51         | 0.337       | 0.001  | 2.4                                   |
|                                    |                               |                        |       |              | <b>Sum=</b> | 0.2277 | 455                                   |

Estimated 22% of shooting fatalities (455 deaths) attributable to increasing delay to trauma center care

Pc, proportion of cases (shooting fatalities) exposed to specific TT; MRR, mortality rate ratio; AP, attributable proportion; PAF, population attributable fraction
